# Supplementary material for: ToP: A Trend-of-Disease-Progression Procedure Works Well for Identifying Cancer Genes from Multi-State Cohort Gene Expression Data for Human Colorectal Cancer
Source: PLoS One. 2013 Jun 14;8(6):e65683. doi: 10.1371/journal.pone.0065683 (PMC3683052; doi:10.1371/journal.pone.0065683)
Supplement: Table S1 — Gene ontology enrichment results for six DEGs clusters. (XLS) [file pone.0065683.s010.xls]

## Sheet: Sheet1
Table S1. Gene ontology enrichment results for six DEGs clusters.
Cluster	GO category	p-value
C1	immune response	1.52e-16
C2	blood vessel development	1.95e-18
C3	response to stress	0.000788
C4	small molecule metabolic process	0.000107
C5	ncRNA metabolic process	8.48e-11
C6	negative regulation of apoptosis	0.0055
