# Supplementary material for: ToP: A Trend-of-Disease-Progression Procedure Works Well for Identifying Cancer Genes from Multi-State Cohort Gene Expression Data for Human Colorectal Cancer
Source: PLoS One. 2013 Jun 14;8(6):e65683. doi: 10.1371/journal.pone.0065683 (PMC3683052; doi:10.1371/journal.pone.0065683)
Supplement: Table S2 — Gene ontology enrichment analysis for the four networks. (XLS) [file pone.0065683.s011.xls]

## Sheet: Sheet1
Table S2. Gene ontology enrichment analysis for the four networks.
GO category	Nor		Ade		IBD		CRC		Full dataset
	Gene number category/network (%)	p-value	Gene number category/network (%)	p-value	Gene number category/network (%)	p-value	Gene number category/network (%)	p-value	Gene number category/total (%)
DNA replication	71/1436 (4.94%)	9.04e-25	89/1802 (4.94%)	8.24e-32	73/2478 (2.95%)	5.29e-13	121/2319 (5.22%)	1.05e-48	230/18267 (1.26%)
DNA repair	77/1436 (5.36%)	1.25e-21	96/1802 (5.33%)	3.18e-27	85/2478 (3.43%)	3.05e-12	127/2319 (5.48%)	6.35e-39	296/18267 (1.62%)
Cell cycle	232/1436 (16.16%)	1.01e-59	321/1802 (17.81%)	3.35e-98	325/2478 (13.12%)	7.86e-64	371/2319 (16.00%)	<1E-100	943/18267 (5.16%)
Cell proliferation	221/1436 (15.39%)	6.54e-43	252/1802 (13.98%)	8.55e-42	366/2478 (14.77%)	8.99e-71	318/2319 (13.71%)	2.22e-52	1074/18267 (5.88%)
RNA metabolism	416/1436 (28.97%)	1.07e-71	464/1802 (25.75%)	7.21e-63	576/2478 (23.24%)	2.22e-62	615/2319 (26.52%)	1.8e-92	2232/18267 (12.22%)
Transcription	391/1436 (27.23%)	5.76e-54	424/1802 (23.53%)	7.58e-41	560/2478 (22.60%)	1.86e-49	549/2319 (23.67%)	2.91e-55	2329/18267 (12.75%)
Translation	53/1436 (3.69%)	1.8e-05	88/1802 (4.88%)	1.27e-14	90/2478 (3.63%)	3.5e-08	117/2319 (5.05%)	7.05e-21	382/18267 (2.09%)
Apoptosis	215/1436 (14.97%)	2.36e-41	227/1802 (12.60%)	7.71e-32	337/2478 (13.60%)	8.94e-58	315/2319 (13.58%)	2.99e-53	1050/18267 (5.75%)
Signal transduction	343/1436 (23.89%)	9.09e-47	395/1802 (21.92%)	1.94e-44	591/2478 (23.85%)	1.48e-85	496/2319 (21.39%)	9.68e-54	2038/18267 (11.16%)
Immune system	215/1436 (14.97%)	9.32e-46	194/1802 (10.77%)	5.7e-22	324/2478 (13.08%)	7.11e-58	280/2319 (12.07%)	5.95e-42	988/18267 (5.41%)
Cell adhesion	116/1436 (8.08%)	2.2e-14	127/1802 (7.05%)	1.66e-11	211/2478 (8.51%)	5.48e-30	155/2319 (6.68%)	3.92e-12	717/18267 (3.93%)
