# Supplementary material for: ToP: A Trend-of-Disease-Progression Procedure Works Well for Identifying Cancer Genes from Multi-State Cohort Gene Expression Data for Human Colorectal Cancer
Source: PLoS One. 2013 Jun 14;8(6):e65683. doi: 10.1371/journal.pone.0065683 (PMC3683052; doi:10.1371/journal.pone.0065683)
Supplement: Table S3 — The 397 predicted cancer genes curated by the ToP procedure. Genes in the first column marked by “*”, exclusively from the Nor-Ade-CRC sequence; Genes marked by “#”, exclusively from the Nor-IBD-CRC sequence; Genes without marks, from both. (XLS) [file pone.0065683.s012.xls]

## Sheet: Sheet1
Table S3. The 397 predicted cancer genes curated by the ToP procedure. Genes in the first column marked by “*”, exclusively from the Nor-Ade-CRC sequence; Genes marked by “#”, exclusively from the Nor-IBD-CRC sequence; Genes without marks, from both.
Gene	Degree			Clustering coefficient			CancerGenes
	Nor	Ade/IBD	CRC	Nor	Ade/IBD	CRC
*BTK	4	0	8	0	0	0.0714	YES
*EGFR	2	0	14	0	0	0.044	YES
*GNAI2	2	2	6	0	0	0.2	YES
*HNRNPD	1	5	15	0	0.6	0.3333	YES
*KRT18	3	1	12	0	0	0.3485	YES
*MMP2	0	0	12	0	0	0.0303	YES
*PECAM1	1	1	7	0	0	0.1429	YES
*PLCG2	1	1	7	0	0	0.0952	YES
*RB1	1	6	11	0	0	0.0182	YES
*TGFB1	5	1	10	0	0	0.0222	YES
*ACTN1	3	4	8	0	0.1667	0.5357	NO
*CCT8	1	7	9	0	0.7619	1	NO
*CD19	2	0	6	0	0	0.1333	NO
*DCN	3	0	6	0	0	0.4	NO
*PABPC1	2	1	7	0	0	0.1905	NO
*PPP1R8	0	2	6	0	0	0.2	NO
ANAPC1	0	2/0	6	0	0.00/0.00	0.4	YES
ANAPC10	0	2/0	7	0	0.00/0.00	0.2857	YES
ANAPC11	0	1/0	7	0	0.00/0.00	0.2857	YES
ANP32B	0	4/4	13	0	0.00/0.17	0.3077	YES
ATR	1	0/0	7	0	0.00/0.00	0.2381	YES
AURKB	6	7/6	10	0.0667	0.19/0.07	0.1556	YES
BAZ1B	1	2/4	7	0	1.00/0.33	0.4762	YES
BCL2	2	0/5	6	0	0.00/0.10	0.2	YES
BIRC5	1	6/1	10	0	0.20/0.00	0.1333	YES
BUB1B	4	6/4	7	0.1667	0.13/0.00	0.3333	YES
CAD	3	5/7	16	0	0.20/0.38	0.6417	YES
CBX1	0	1/3	7	0	0.00/0.00	0.1905	YES
CCNA2	5	9/5	14	0.1	0.17/0.00	0.1648	YES
CCND1	1	0/1	9	0	0.00/0.00	0.0556	YES
CCNE1	1	4/0	11	0	0.17/0.00	0.1091	YES
CD3EAP	0	2/4	11	0	1.00/0.33	0.3818	YES
CDC25A	2	5/1	11	0	0.00/0.00	0.0727	YES
CDC25B	2	1/0	9	0	0.00/0.00	0.0556	YES
CDC25C	0	7/0	8	0	0.29/0.00	0.1786	YES
CDC27	0	0/0	8	0	0.00/0.00	0.2143	YES
CDC37	1	0/0	14	0	0.00/0.00	0.1648	YES
CDC6	3	10/0	15	0	0.33/0.00	0.3524	YES
CDK2	1	22/3	48	0	0.05/0.00	0.0452	YES
CDK4	0	8/3	17	0	0.11/0.00	0.0809	YES
CDT1	0	3/0	8	0	0.33/0.00	0.4643	YES
CEBPB	1	1/6	7	0	0.00/0.00	0.0476	YES
CHAF1A	0	4/0	15	0	0.00/0.00	0.1524	YES
CHEK1	3	5/1	7	0	0.20/0.00	0.0952	YES
COL1A1	0	7/11	15	0	0.19/0.18	0.1714	YES
COL1A2	1	5/8	12	0	0.40/0.32	0.2424	YES
COPS5	2	1/4	12	0	0.00/0.33	0.2424	YES
CSNK2A1	2	20/0	26	0	0.02/0.00	0.0554	YES
CSNK2A2	0	0/0	30	0	0.00/0.00	0.0391	YES
CSNK2B	0	1/1	24	0	0.00/0.00	0.0399	YES
CTNNB1	7	1/6	27	0	0.00/0.13	0.0712	YES
CUL1	6	5/9	14	0	0.00/0.11	0.1099	YES
DDX3X	2	0/0	8	0	0.00/0.00	0.2857	YES
DHX9	1	22/6	43	0	0.12/0.40	0.3223	YES
DNMT1	1	3/4	8	0	0.00/0.00	0.1071	YES
E2F1	2	0/0	11	0	0.00/0.00	0.1273	YES
E2F5	1	1/0	7	0	0.00/0.00	0.2857	YES
EEF1E1	0	4/3	9	0	0.83/0.33	0.6667	YES
EIF2S1	1	5/0	8	0	0.00/0.00	0.1071	YES
EIF3E	5	1/5	15	0	0.00/0.30	0.2	YES
EIF3I	0	0/0	9	0	0.00/0.00	0.4722	YES
EIF4G1	1	0/0	7	0	0.00/0.00	0.0476	YES
ELAVL1	2	9/24	37	0	0.50/0.23	0.4054	YES
ERCC3	1	1/3	7	0	0.00/0.00	0.1429	YES
EXOSC9	0	0/0	12	0	0.00/0.00	0.4242	YES
EZH2	0	6/3	11	0	0.07/0.00	0.0182	YES
FAS	1	0/0	9	0	0.00/0.00	0.0278	YES
FASN	0	5/0	22	0	0.50/0.00	0.5325	YES
FBL	6	23/17	30	0.2	0.28/0.24	0.3264	YES
FN1	1	1/4	15	0	0.00/0.00	0.1143	YES
FUS	1	6/2	8	0	0.13/0.00	0.0714	YES
GTF2H4	1	1/1	10	0	0.00/0.00	0.2667	YES
GTPBP4	1	6/3	12	0	0.53/0.00	0.697	YES
HDAC2	0	3/10	35	0	0.00/0.04	0.0689	YES
HMGA1	0	0/0	6	0	0.00/0.00	0.1333	YES
HMGB1	1	0/1	11	0	0.00/0.00	0.0182	YES
HNRNPK	7	16/30	50	0.1905	0.17/0.16	0.2514	YES
HNRNPL	0	1/0	17	0	0.00/0.00	0.5956	YES
HNRNPU	14	21/22	41	0.1758	0.22/0.30	0.3244	YES
HSP90AA1	3	9/4	37	0	0.03/0.00	0.0841	YES
HSP90AB1	4	8/2	17	0	0.11/0.00	0.3529	YES
HSPA8	0	0/4	23	0	0.00/0.00	0.083	YES
ILF3	0	7/2	13	0	0.05/0.00	0.141	YES
IQGAP2	0	0/0	7	0	0.00/0.00	0.5714	YES
ITGA5	1	4/7	8	0	0.00/0.00	0.2143	YES
ITGB1	1	3/2	12	0	0.00/0.00	0.0455	YES
KAT2B	2	3/5	8	0	0.00/0.10	0.0714	YES
KHDRBS1	0	5/2	11	0	0.10/0.00	0.0909	YES
KPNA2	0	5/4	14	0	0.20/0.33	0.0769	YES
LSM2	0	4/0	10	0	0.00/0.00	0.2667	YES
MAD2L1	1	5/3	9	0	0.20/0.00	0.1389	YES
MAPK3	1	4/13	14	0	0.00/0.00	0.011	YES
MCM3	7	15/9	18	0.381	0.36/0.47	0.3856	YES
MMP9	0	0/3	6	0	0.00/0.00	0.2667	YES
MNAT1	1	2/0	8	0	0.00/0.00	0.1429	YES
MORF4L2	1	3/0	11	0	0.67/0.00	0.5455	YES
MRE11A	0	1/0	6	0	0.00/0.00	0.0667	YES
MSH2	4	2/2	14	0.1667	1.00/0.00	0.1758	YES
MTHFD1	2	6/2	14	0	0.47/1.00	0.6813	YES
MYBL2	0	4/1	10	0	0.00/0.00	0.1333	YES
MYC	1	0/1	21	0	0.00/0.00	0.0333	YES
NBN	0	3/1	13	0	0.33/0.00	0.1538	YES
NCL	13	27/25	59	0.1026	0.17/0.18	0.235	YES
NFKBIB	0	0/3	11	0	0.00/0.00	0.2	YES
NFYB	1	0/3	7	0	0.00/0.00	0.0476	YES
NONO	3	18/15	28	0.3333	0.29/0.39	0.455	YES
NPM1	2	15/12	37	0	0.34/0.59	0.3874	YES
NUP153	0	2/3	9	0	1.00/0.00	0.2222	YES
NUP62	0	4/4	11	0	0.00/0.00	0.0909	YES
NUP98	1	1/0	7	0	0.00/0.00	0.1905	YES
PARP1	7	6/13	31	0.381	0.27/0.41	0.4366	YES
PDCD2	0	2/1	9	0	1.00/0.00	0.3889	YES
PES1	0	3/3	9	0	1.00/0.33	0.6111	YES
PFDN2	0	0/2	6	0	0.00/1.00	0.4667	YES
PIN1	0	6/0	11	0	0.00/0.00	0.0545	YES
PLAU	0	0/5	6	0	0.00/0.00	0.0667	YES
PLK1	0	13/1	34	0	0.03/0.00	0.1123	YES
PML	0	0/0	11	0	0.00/0.00	0.0545	YES
POLA1	0	5/0	10	0	0.30/0.00	0.2444	YES
POLD1	0	8/0	11	0	0.11/0.00	0.2545	YES
POLR1A	1	0/0	10	0	0.00/0.00	0.2889	YES
POLR1D	0	1/0	7	0	0.00/0.00	0.619	YES
POLR1E	1	1/0	9	0	0.00/0.00	0.4167	YES
POLR2F	0	5/0	6	0	0.00/0.00	0.4	YES
POLR2G	0	3/3	7	0	0.00/0.00	0.381	YES
POLR2I	1	0/0	7	0	0.00/0.00	0.619	YES
POLR2L	1	0/0	12	0	0.00/0.00	0.1364	YES
PRKDC	7	19/13	70	0.0476	0.22/0.19	0.1839	YES
PRMT1	2	8/4	17	0	0.11/0.00	0.1176	YES
PRMT5	0	6/1	8	0	0.33/0.00	0.25	YES
PRPF19	0	0/1	10	0	0.00/0.00	0.8	YES
PSMC2	1	5/4	14	0	0.10/0.17	0.2308	YES
PSMC3	1	3/0	9	0	1.00/0.00	0.6111	YES
PSMD1	0	4/1	23	0	0.33/0.00	0.4466	YES
PSMD12	1	3/2	6	0	1.00/1.00	0.6667	YES
PSMD13	1	3/0	6	0	0.67/0.00	0.8667	YES
PSMD6	2	6/2	8	0	0.33/1.00	0.6071	YES
PSMD7	0	2/2	10	0	0.00/0.00	0.5111	YES
PTBP1	4	15/6	23	0.1667	0.32/0.40	0.2174	YES
PTK2	0	2/1	10	0	0.00/0.00	0.0667	YES
PTMA	0	5/0	13	0	0.40/0.00	0.141	YES
PTPN11	1	0/2	17	0	0.00/0.00	0.0441	YES
RAD51	1	8/0	11	0	0.11/0.00	0.0545	YES
RBBP4	1	1/3	7	0	0.00/0.33	0.5714	YES
RBBP7	2	3/4	17	0	0.00/0.17	0.2206	YES
RBL1	1	2/1	10	0	0.00/0.00	0.1111	YES
RBX1	1	4/5	6	0	0.17/0.10	0.2667	YES
RFC1	0	1/3	11	0	0.00/0.33	0.2364	YES
RFC5	5	9/5	13	0.1	0.44/0.40	0.2821	YES
RPA2	1	0/2	10	0	0.00/0.00	0.0444	YES
RPL30	2	2/4	7	0	0.00/0.67	0.5714	YES
RPL4	1	7/10	19	0	0.29/0.58	0.3801	YES
RPL7A	0	2/8	11	0	1.00/0.68	0.4909	YES
RUVBL1	0	2/0	17	0	1.00/0.00	0.2647	YES
RUVBL2	0	3/0	18	0	0.33/0.00	0.3137	YES
SAFB	2	0/3	6	0	0.00/0.00	0.0667	YES
SAP30	0	4/1	7	0	0.17/0.00	0.4762	YES
SET	3	0/3	10	0	0.00/0.00	0.1778	YES
SFPQ	5	27/10	32	0	0.25/0.24	0.4738	YES
SFRS3	1	0/3	7	0	0.00/0.00	0.0952	YES
SKP2	1	9/2	16	0	0.08/0.00	0.1083	YES
SMARCA4	1	4/7	27	0	0.17/0.05	0.0712	YES
SMC1A	2	3/0	10	0	0.00/0.00	0.1111	YES
SMN1	1	3/2	22	0	0.00/1.00	0.1558	YES
SRPK1	1	3/4	15	0	0.00/0.17	0.1619	YES
STRAP	0	2/0	8	0	0.00/0.00	0.4286	YES
SUMO1	4	4/10	13	0	0.00/0.00	0.0513	YES
SUPT16H	1	5/5	8	0	0.40/0.20	0.3214	YES
SUV39H1	0	2/1	9	0	0.00/0.00	0.2222	YES
SYNCRIP	5	8/8	13	0.1	0.43/0.43	0.5128	YES
TBP	0	4/8	15	0	0.00/0.07	0.0095	YES
TFDP1	1	1/2	6	0	0.00/0.00	0.2667	YES
TGFBI	0	1/5	6	0	0.00/0.20	0.1333	YES
THOC4	0	0/4	6	0	0.00/0.00	0.0667	YES
TOP1	2	0/1	20	0	0.00/0.00	0.3737	YES
TOP2A	6	28/11	47	0.0667	0.20/0.07	0.2914	YES
TPX2	3	8/2	12	0	0.36/0.00	0.6061	YES
TRAF2	5	3/19	22	0	0.00/0.02	0.0216	YES
TRIM28	0	4/2	8	0	0.17/0.00	0.1071	YES
TUBB	9	5/3	41	0.0278	0.00/0.00	0.0841	YES
UBE2I	2	3/4	30	0	0.00/0.17	0.0207	YES
VDAC1	0	0/0	6	0	0.00/0.00	0.0667	YES
WEE1	2	3/3	6	0	0.00/0.00	0.0667	YES
XPO1	1	21/18	45	0	0.03/0.07	0.1566	YES
XRCC1	0	0/0	6	0	0.00/0.00	0.0667	YES
XRCC6	2	7/3	11	0	0.00/0.00	0.0545	YES
YBX1	0	11/8	28	0	0.20/0.14	0.2143	YES
YEATS4	0	3/5	12	0	0.67/0.20	0.6818	YES
YWHAG	1	4/15	52	0	0.00/0.01	0.0189	YES
YWHAQ	1	6/4	17	0	0.13/0.00	0.0882	YES
AARS	1	3/1	17	0	0.00/0.00	0.6544	NO
ACTL6A	4	3/3	23	0	0.33/0.00	0.2055	NO
ACTR6	0	2/2	11	0	1.00/0.00	0.7091	NO
AIMP1	1	1/1	9	0	0.00/0.00	0.6667	NO
AIMP2	1	0/0	6	0	0.00/0.00	0.6667	NO
ALDOA	1	4/1	10	0	0.50/0.00	0.7333	NO
BAT1	0	1/5	8	0	0.00/0.00	0.0714	NO
BCL2L1	2	2/6	9	0	0.00/0.07	0.0833	NO
BUB3	1	4/2	6	0	0.33/0.00	0.4	NO
C19orf2	1	0/4	19	0	0.00/0.67	0.4094	NO
C1QBP	4	6/6	16	0	0.27/0.13	0.2333	NO
C20orf20	0	2/0	14	0	0.00/0.00	0.4725	NO
CBX3	1	3/4	8	0	0.00/0.00	0.0357	NO
CCT2	2	9/6	16	0	0.58/0.40	0.4917	NO
CCT3	0	5/6	11	0	0.60/0.67	0.6727	NO
CCT4	0	7/7	17	0	0.71/0.67	0.4559	NO
CCT5	2	9/4	12	0	0.44/1.00	0.5606	NO
CCT6A	2	5/7	9	0	0.90/0.67	1	NO
CCT7	1	9/9	18	0	0.56/0.28	0.4118	NO
CD74	3	5/5	6	0	0.50/0.30	0.3333	NO
CDC45	0	5/2	8	0	0.30/1.00	0.4643	NO
CDK1	21	39/15	68	0.0095	0.03/0.02	0.0145	NO
CDK8	1	6/0	16	0	0.27/0.00	0.1417	NO
CENPA	2	5/3	6	0	0.30/0.00	0.4	NO
CHERP	0	8/7	17	0	0.61/0.33	0.7868	NO
CHTF18	0	11/0	24	0	0.35/0.00	0.3913	NO
COIL	2	4/4	21	0	0.00/0.00	0.019	NO
COPS6	1	2/0	24	0	0.00/0.00	0.0543	NO
COPS7B	1	0/1	6	0	0.00/0.00	0.4667	NO
COPS8	0	0/2	9	0	0.00/0.00	0.3889	NO
CPSF1	1	0/0	16	0	0.00/0.00	0.3833	NO
CSE1L	0	1/1	7	0	0.00/0.00	0.0476	NO
CSTF1	0	0/1	7	0	0.00/0.00	0.1905	NO
DARS	0	6/3	10	0	0.33/0.33	0.4667	NO
DBF4	0	9/4	13	0	0.36/0.00	0.3974	NO
DCP1A	1	2/0	6	0	0.00/0.00	0.1333	NO
DDX1	4	6/2	9	0.5	0.27/1.00	0.75	NO
DDX20	0	12/1	15	0	0.26/0.00	0.2381	NO
DDX21	3	4/1	16	0	0.83/0.00	0.6	NO
DHX30	2	4/12	21	0	0.17/0.15	0.3143	NO
DIS3	0	1/3	8	0	0.00/0.00	0.6071	NO
DNAJB1	0	0/0	8	0	0.00/0.00	0.2143	NO
DNAJB11	0	4/2	6	0	1.00/1.00	0.6667	NO
DNAJC8	1	0/2	9	0	0.00/0.00	0.8889	NO
EEF1D	0	0/3	7	0	0.00/0.00	0.0952	NO
EIF2S2	1	0/1	8	0	0.00/0.00	0.1429	NO
EIF3A	1	2/7	9	0	1.00/0.10	0.2778	NO
EIF3F	0	5/3	9	0	0.30/0.33	0.4722	NO
EIF3G	0	4/1	7	0	0.67/0.00	0.619	NO
EIF3H	1	2/7	21	0	0.00/0.24	0.3619	NO
EIF3J	0	4/0	9	0	0.67/0.00	0.4444	NO
EIF3M	0	6/5	21	0	0.13/0.60	0.5762	NO
EPRS	3	2/2	27	0	0.00/1.00	0.2821	NO
EXOSC2	0	3/2	15	0	0.33/0.00	0.2952	NO
EXOSC3	0	4/0	14	0	0.17/0.00	0.3846	NO
EXOSC4	0	0/3	18	0	0.00/0.00	0.2092	NO
EXOSC5	0	0/0	12	0	0.00/0.00	0.3182	NO
EXOSC6	0	3/0	14	0	0.00/0.00	0.3516	NO
EXOSC7	0	1/2	9	0	0.00/0.00	0.7222	NO
EXOSC8	1	3/1	13	0	0.33/0.00	0.4615	NO
FMR1	0	2/0	6	0	0.00/0.00	0.2	NO
GDF9	0	0/0	8	0	0.00/0.00	0.0357	NO
GEMIN5	0	5/2	8	0	0.60/0.00	0.6429	NO
GEMIN6	0	5/0	9	0	0.50/0.00	0.7222	NO
GPS1	1	1/0	8	0	0.00/0.00	0.3929	NO
GTF2E2	2	1/0	8	0	0.00/0.00	0.1786	NO
HCFC1	2	3/2	16	0	0.00/0.00	0.1583	NO
HIST1H1C	2	0/0	16	0	0.00/0.00	0.85	NO
HLA-DRA	5	6/4	8	0	0.33/0.50	0.2143	NO
HNRNPA1	4	3/12	26	0.1667	1.00/0.42	0.5138	NO
HNRNPA2B1	1	12/6	23	0	0.61/0.47	0.7312	NO
HNRNPA3	5	7/4	13	0.5	0.90/0.83	0.7051	NO
HNRNPR	5	21/13	31	0.1	0.33/0.31	0.5269	NO
HNRNPUL1	1	4/1	15	0	0.33/0.00	0.6476	NO
HSF1	1	0/0	17	0	0.00/0.00	0.0956	NO
HSP90B1	2	6/1	8	0	0.47/0.00	0.3571	NO
HSPA5	2	5/5	9	0	0.60/0.10	0.3333	NO
HSPA9	2	4/2	6	0	0.33/1.00	0.4	NO
HSPBP1	0	0/0	6	0	0.00/0.00	0.4667	NO
HSPH1	0	0/1	19	0	0.00/0.00	0.5029	NO
IARS	2	6/2	10	0	0.40/1.00	0.5778	NO
IARS2	0	0/4	11	0	0.00/0.50	0.8182	NO
ILF2	1	7/4	12	0	0.29/0.50	0.6364	NO
INO80E	0	0/0	7	0	0.00/0.00	0.7619	NO
IPO5	1	4/3	10	0	0.00/0.33	0.1333	NO
KARS	0	3/1	12	0	1.00/0.00	0.4091	NO
KDM1A	0	0/0	6	0	0.00/0.00	0.3333	NO
LDHA	1	3/2	14	0	0.67/0.00	0.6264	NO
LSM4	0	4/0	7	0	0.17/0.00	0.6667	NO
LSM5	0	4/4	8	0	0.17/0.33	0.5714	NO
MARS	1	3/0	10	0	0.33/0.00	0.6	NO
MCRS1	0	0/1	11	0	0.00/0.00	0.0727	NO
MEAF6	0	1/4	7	0	0.00/0.50	0.8095	NO
MED1	2	7/3	9	0	0.00/0.00	0.1944	NO
MED17	1	2/4	10	0	1.00/0.00	0.1778	NO
MED21	0	8/4	11	0	0.18/0.00	0.2545	NO
MED22	1	0/4	7	0	0.00/0.33	0.7143	NO
MED26	0	2/2	7	0	0.00/1.00	0.381	NO
MED30	0	4/3	13	0	0.83/0.00	0.2692	NO
MKI67	2	11/0	24	0	0.38/0.00	0.6594	NO
MYBBP1A	1	0/3	16	0	0.00/0.33	0.325	NO
NAA38	0	2/3	8	0	0.00/0.33	0.1786	NO
NAT10	4	13/13	27	0.5	0.56/0.50	0.7578	NO
NCBP1	1	3/1	7	0	0.33/0.00	0.0952	NO
NDC80	9	9/5	13	0.0833	0.11/0.10	0.1154	NO
NOLC1	1	9/11	28	0	0.78/0.62	0.5741	NO
NOP2	0	4/0	23	0	0.83/0.00	0.6719	NO
NOP56	2	5/4	14	0	0.50/0.67	0.5714	NO
NOP58	1	9/4	16	0	0.44/0.33	0.5583	NO
NUDT21	5	14/12	28	0.1	0.20/0.18	0.246	NO
NUP133	1	0/0	6	0	0.00/0.00	0.4	NO
ORC1L	0	10/0	16	0	0.40/0.00	0.375	NO
ORC2L	1	0/0	21	0	0.00/0.00	0.2952	NO
ORC3L	0	0/4	11	0	0.00/0.33	0.4909	NO
ORC5L	1	0/2	14	0	0.00/0.00	0.5275	NO
ORC6L	0	10/6	13	0	0.56/0.40	0.6026	NO
PDCD7	0	1/0	10	0	0.00/0.00	0.6889	NO
PDIA6	2	5/1	7	0	0.70/0.00	0.4762	NO
PDRG1	0	0/2	7	0	0.00/1.00	0.3333	NO
PGK1	1	5/1	24	0	0.40/0.00	0.5145	NO
PHF5A	0	5/6	9	0	0.90/0.53	0.8889	NO
PIN4	1	0/0	8	0	0.00/0.00	0.4286	NO
PKM2	1	1/3	16	0	0.00/0.00	0.5833	NO
POLR2C	0	2/0	15	0	0.00/0.00	0.3238	NO
POLR2D	2	6/0	11	0	0.00/0.00	0.2	NO
POLR2E	1	10/5	27	0	0.09/0.10	0.1652	NO
POLR3A	1	3/0	7	0	0.33/0.00	0.7143	NO
PSAT1	0	5/0	18	0	0.40/0.00	0.6732	NO
PSMA2	2	5/4	15	0	0.20/0.50	0.4857	NO
PSMA3	3	11/6	20	0.3333	0.09/0.20	0.3421	NO
PSMA4	2	0/1	18	0	0.00/0.00	0.4641	NO
PSMA6	3	3/5	15	0.3333	0.33/0.30	0.4952	NO
PSMA7	4	3/4	16	0.5	0.67/1.00	0.525	NO
PSMB2	4	2/2	11	0.8333	0.00/1.00	0.9091	NO
PSMB3	5	1/7	9	0.5	0.00/0.29	0.75	NO
PSMB4	1	2/4	13	0	1.00/1.00	0.8462	NO
PTGES3	0	0/0	7	0	0.00/0.00	0.381	NO
RACGAP1	3	3/2	6	0	0.00/0.00	0.1333	NO
RAD21	2	2/5	7	0	0.00/0.60	0.2381	NO
RANGAP1	0	3/0	7	0	0.33/0.00	0.2381	NO
RARS	0	2/0	7	0	1.00/0.00	0.7143	NO
RBMX	1	11/15	31	0	0.27/0.17	0.2323	NO
RCC1	2	3/0	6	0	0.33/0.00	0.2667	NO
RFC2	0	6/1	9	0	1.00/0.00	0.5833	NO
RNPS1	2	5/4	8	0	0.20/0.00	0.0714	NO
RPAP3	1	3/7	14	0	0.00/0.52	0.6154	NO
RPL5	2	4/8	14	0	0.17/0.43	0.3187	NO
RPL6	5	7/9	25	0.2	0.48/0.44	0.2967	NO
RPL8	0	1/2	8	0	0.00/1.00	0.6071	NO
RPLP0	0	5/3	10	0	0.40/1.00	0.3111	NO
RPS16	1	2/1	11	0	1.00/0.00	0.6364	NO
RPS9	0	6/2	7	0	0.60/1.00	0.8571	NO
RPSA	0	5/4	7	0	0.30/0.17	0.5714	NO
RSL1D1	0	0/2	7	0	0.00/1.00	0.9048	NO
SF3A2	1	1/3	21	0	0.00/0.33	0.5238	NO
SF3B1	5	10/15	19	0.2	0.07/0.17	0.5146	NO
SFRS1	2	13/10	52	0	0.18/0.24	0.2443	NO
SFRS2	2	8/8	10	0	0.07/0.25	0.4	NO
SFRS7	1	10/7	25	0	0.31/0.33	0.3633	NO
SIP1	0	10/3	11	0	0.20/0.00	0.1636	NO
SKIV2L2	0	0/2	8	0	0.00/0.00	0.6786	NO
SMNDC1	2	9/3	15	0	0.42/0.33	0.8476	NO
SNRNP25	1	5/0	8	0	0.90/0.00	0.9286	NO
SNRPA	1	6/0	15	0	0.47/0.00	0.5143	NO
SNRPA1	0	5/11	41	0	0.50/0.29	0.4183	NO
SNRPB	0	3/2	35	0	0.67/0.00	0.2874	NO
SNRPB2	1	8/2	12	0	0.39/0.00	0.697	NO
SNRPC	1	5/0	9	0	0.30/0.00	0.4444	NO
SNRPD1	1	21/12	34	0	0.18/0.30	0.2923	NO
SNRPD2	0	11/6	36	0	0.13/0.33	0.281	NO
SNRPD3	4	18/12	30	0.1667	0.14/0.21	0.2736	NO
SNRPF	1	10/10	20	0	0.27/0.27	0.3842	NO
SNRPG	1	17/7	30	0	0.21/0.48	0.3632	NO
SPARC	2	3/7	9	0	0.33/0.10	0.1389	NO
SRF	0	0/0	7	0	0.00/0.00	0.0476	NO
SRRM1	3	8/7	10	0	0.07/0.24	0.3111	NO
STAU1	0	0/0	9	0	0.00/0.00	0.1667	NO
STIP1	0	2/0	7	0	0.00/0.00	0.4286	NO
TAF9	0	0/2	8	0	0.00/0.00	0.0357	NO
TBL3	0	0/4	6	0	0.00/0.00	0.2	NO
TCOF1	0	10/0	25	0	0.51/0.00	0.6167	NO
TCP1	2	11/3	27	0	0.22/0.33	0.3276	NO
TRA@	2	1/5	6	0	0.00/0.60	0.2667	NO
TRAP1	1	3/0	19	0	0.33/0.00	0.7719	NO
TTF2	2	5/4	8	0	0.00/0.00	0.0714	NO
TUBA1B	0	2/7	10	0	0.00/0.52	0.8	NO
TUBA4A	0	1/3	23	0	0.00/0.33	0.1937	NO
U2AF2	1	12/5	17	0	0.21/0.10	0.1324	NO
UBA1	0	2/3	14	0	0.00/0.00	0.5165	NO
UBA2	0	4/2	6	0	0.00/0.00	0.2	NO
UBAP2L	0	1/1	7	0	0.00/0.00	0.1429	NO
UBQLN4	1	0/1	9	0	0.00/0.00	0.0278	NO
USP7	2	2/0	10	0	0.00/0.00	0.0222	NO
VPS72	0	0/0	10	0	0.00/0.00	0.5556	NO
WBP4	0	1/0	6	0	0.00/0.00	0.4667	NO
WDR5	0	4/1	11	0	0.00/0.00	0.3636	NO
WDR77	1	1/2	6	0	0.00/0.00	0.8	NO
XRCC5	4	6/5	26	0	0.13/0.10	0.1292	NO
ZNHIT1	0	0/1	7	0	0.00/0.00	0.9524	NO
#CCNC	0	1	9	0	0	0.3611	YES
#FANCG	2	0	6	0	0	0.1333	YES
#CPSF6	0	6	16	0	0.4	0.35	NO
#H1FX	0	2	6	0	0	1	NO
#MCM10	2	8	11	0	0.4643	0.4364	NO
#NUF2	5	4	6	0.3	0.1667	0.3333	NO
#RBM17	3	4	13	0.3333	0.5	0.8333	NO
#TCERG1	2	4	14	0	0	0.2088	NO
